# Supplementary material for: Codon usage bias from tRNA's point of view: Redundancy, specialization, and efficient decoding for translation optimization
Source: HighWire-hosted journal article supplement (doi:10.1101/gr.2896904), 2004-10-12
Supplement: Correction.pdf [file Correction.pdf]

**Genome Research 14:** 2279–2286 (2004)

**Codon usage bias from tRNA's point of view: Redundancy, specialization, and efficient decoding for translation optimization**

Eduardo P.C. Rocha

In the first paragraph of the first column on page 2281 and in Figure 1, there is a typo in the definition of  $ENC_{dif}$ . The formula should read:

$$ENC_{dif} = -(ENC'_{RP} - ENC'_{All})/ENC'_{All}$$

Thus, positive values of  $ENC_{dif}$  indicate codon usage bias in ribosomal proteins as mentioned throughout the text.

The authors apologize for any confusion this may have caused.
